# Supplementary material
Source: PubMed Central journal article supplement (PMC8666141)
Supplement: NIHMS1759419-supplement-Supplementary_Appendix.pdf [file NIHMS1759419-supplement-Supplementary_Appendix.pdf]

## SUPPLEMENTARY APPENDIX

Valsartan in Early Stage Sarcomeric Hypertrophic Cardiomyopathy:

A Randomized Phase 2 Trial

## Table of Contents

|                                                                                                                                                                                     |    |
|-------------------------------------------------------------------------------------------------------------------------------------------------------------------------------------|----|
| Table S1. Participating Sites, Investigators, Study Coordinators, and Core Laboratory Directors.....                                                                                | 3  |
| Table S2. Primary and Secondary Outcomes Excluding Participants Who Withdrew from the Trial Early ..                                                                                | 6  |
| Table S3. Primary Outcomes Using Original Eligibility Criteria, Omitting LV Volumes in the Composite Outcome, and Omitting Participants with Maximal LV Wall Thickness >20 mm. .... | 9  |
| Table S4. Proportion of Participants Showing Improvement for Primary and Secondary Outcomes .....                                                                                   | 10 |
| Table S5. Prespecified Subgroup Analyses .....                                                                                                                                      | 11 |
| Table S6. Adjusted changes in Blood Pressure, Serum Creatinine, and Serum Potassium.....                                                                                            | 15 |
| Table S7. Adverse Events .....                                                                                                                                                      | 16 |
| Table S8. Genetic Variants in VANISH Participants .....                                                                                                                             | 19 |
| Table S9. Eligibility Criteria for the VANISH Trial .....                                                                                                                           | 22 |
| Table S10. Primary Model Details.....                                                                                                                                               | 23 |

Table S1. Participating Sites, Investigators, Study Coordinators, and Core Laboratory Directors

**Cardiovascular Division, Brigham and Women's Hospital, Boston, MA, USA**

Carolyn Y. Ho, MD, Neal K. Lakdawala, MD, Allison L. Cirino, MS

Site Coordinator(s): Lauren Conner, Stephanie Harris, Lia Kaynor, Kermshilse Picard

**Department of Cardiology, Boston Children's Hospital, Boston, MA**

Steven D. Colan, MD, Renee Margossian, MD

Site Coordinator: Jane Messere

**University of Michigan, Ann Arbor, MI, USA**

Sharlene M. Day, MD (currently at University of Pennsylvania); Mark Russell, MD

Site Coordinators: Maryann Concannon, Ben Johnson

**Department of Cardiology, Copenhagen University Hospital Rigshospitalet, Copenhagen, Denmark**

Anna Axelsson, MD, PhD, Henning Bundgaard, MD, PhD

Site Coordinators: Elsebet Eriksen, Jeanette Broberg

**Cleveland Clinic Foundation, Cleveland OH, USA**

Kenneth Zahka, MD, Harry M. Lever, MD

Site Coordinators: Rita Brienza RN, BSN, Andrea Rohr, BS

**Laboratory of Genetics and Molecular Cardiology, Heart Institute, University of Sao Paulo Medical School, Brazil**

Alexandre C. Pereira, MD, PhD, Jose E Krieger, MD, PhD, Luciana Sacilotto, MD, Edmundo Arteaga, MD, Murilo O Antunes, MD

Site Coordinator: Alexandra Vieira

**Division of Pediatric Cardiology, Department of Pediatrics, Johns Hopkins University School of Medicine, Baltimore, MD, USA**

Anne M. Murphy, MD

Site Coordinators: Yemissi Sanni, Olivia Koerner Swift, Haley Rue

**Washington University School of Medicine, St. Louis, MO, USA**

Charles Canter, MD (,Department of Pediatrics); Richard Bach, MD (Cardiovascular Division, Department of Medicine)

Site Coordinator: Teresa Roberson

**Division of Cardiovascular Medicine, Department of Medicine, Stanford University School of Medicine, Stanford, CA, USA**

Matthew T. Wheeler, MD, PhD, Euan Ashley, MD, PhD

Site Coordinators: Austin E Bland, Jeffrey W Christle, Annika M Dries, Brianna M Tucker, Rebecca Fuhlbrigge, Aleksandra Pavlovic, Yael Shmargad, Dana Ben-Tzur

**Heart Institute, Cincinnati Children's Hospital Medical Center, Cincinnati, OH, USA**

Ivan Wilmot, MD

Site Coordinators: Paula Casson, Amy Pajk, Lauren Bueche

**Vanderbilt University Medical Center, Nashville, TN, USA**

Jason R. Becker, MD (currently at University of Pittsburgh Medical Center); Jonathan H. Soslow, MD

Site Coordinator: Susan M. Sommers, RN

**Division of Cardiovascular Medicine Department of Medicine, University of Pennsylvania Perelman School of Medicine, Philadelphia, PA, USA**

Anjali T. Owens, MD

Site Coordinators: Laura Fleszar, Jessica Kim

**Children's Hospital of Philadelphia, Philadelphia, PA, USA**

Joseph W. Rossano, MD, Kimberly Y. Lin, MD

Site Coordinator: Sydney Reilly

**Toronto Hospital for Sick Children, Toronto, ON, Canada**

Lee Benson, MD

Site Coordinator: Rita Nobile

**University of Colorado Anschutz Medical Campus, Aurora, CO, USA**

Luisa Mestroni, MD, Matthew Taylor, MD, PhD

Site Coordinators: Mercedes Zirbes , Jean Jirikowic

**Department of Medicine, University of Chicago, Chicago, IL, USA**

Amit R. Patel, MD

Site Coordinator: Tiffany Hart

**Ann & Robert H Lurie Children's Hospital of Chicago, Chicago, IL, USA**

Philip Thrush, MD, Elfriede Pahl, MD

**Yale University School of Medicine, New Haven, CT, USA (Virtual Site)**

E. Kevin Hall, MD

**Feinberg School of Medicine, Bluhm Cardiovascular Institute, Northwestern University, Chicago, IL, USA (Virtual Site)**

Lubna Choudhury, MD

### **Core Laboratory Directors**

#### **Echocardiography Core Laboratory**

Steven D. Colan, MD, Renee Margossian, MD  
Department of Cardiology, Boston Children's Hospital, Boston, MA , USA

#### **Cardiac Magnetic Resonance Imaging Core Laboratory**

Jose D. Vargas, MD, PhD  
MedStar Heart and Vascular Institute, Washington, DC, USA

#### **Cardiopulmonary Exercise Core Laboratory**

Gregory D. Lewis, MD  
Cardiac Unit, Massachusetts General Hospital, Boston, MA, USA

### **Clinical Events Committee**

Chair:

Akshay S. Desai, MD, MPH  
Cardiovascular Division, Brigham and Women's Hospital, Boston, MA, USA

Members:

Neal K. Lakdawala, MD  
Cardiovascular Division, Brigham and Women's Hospital, Boston, MA USA

Elizabeth D. Blume, MD  
Department of Cardiology, Boston Children's Hospital, Boston, MA , USA

### **Executive Committee**

Eugene Braunwald, MD  
Cardiovascular Division, Brigham and Women's Hospital, Boston, MA, USA  
Carolyn Y. Ho, MD  
Cardiovascular Division, Brigham and Women's Hospital, Boston, MA, USA

Calum A. MacRae, MD, PhD  
Cardiovascular Division, Brigham and Women's Hospital, Boston, MA, USA

John J.V. McMurray, MD  
British Heart Foundation Cardiovascular Research Centre, University of Glasgow, Glasgow, UK

E. John Orav, MD  
Department of Medicine, Brigham and Women's Hospital, Boston, MA, USA

Scott D. Solomon, MD  
Cardiovascular Division, Brigham and Women's Hospital, Boston, MA, USA

Table S2. Primary and Secondary Outcomes Excluding Participants Who Withdrew from the Trial Early

| <b>Outcome</b>                               | <b><u>Including All 178 Patients</u></b><br><b>Adjusted Change in Z-score*</b> | <b><u>Excluding 11 Early Withdrawals</u></b><br><b>Adjusted Change in Z-score*</b> |
|----------------------------------------------|--------------------------------------------------------------------------------|------------------------------------------------------------------------------------|
| <b>Composite Z-Score</b>                     | <b>P=0.001</b>                                                                 | <b>P=0.001</b>                                                                     |
| Valsartan                                    | +0.136 [0.049, 0.223]                                                          | +0.135 [0.055, 0.216]                                                              |
| Placebo                                      | -0.095 [-0.192, 0.002]                                                         | -0.109 [-0.190, -0.028]                                                            |
| Difference                                   | 0.231 [0.098, 0.364]                                                           | 0.244 [0.127, 0.362]                                                               |
| <b>Components of the Primary Outcome</b>     |                                                                                |                                                                                    |
| <b>Maximum LV Wall Thickness<sup>a</sup></b> | <b>P=0.062</b>                                                                 | <b>P=0.039</b>                                                                     |
| Valsartan                                    | 0.16 [-0.69, +1.00]                                                            | 0.13 [-0.69, +0.94]                                                                |
| Placebo                                      | 1.32 [+0.42, +2.21]                                                            | 1.35 [+0.54, +2.17]                                                                |
| Difference                                   | -1.16 [-2.37, +0.06]                                                           | -1.23 [-2.39, -0.06]                                                               |
| <b>E' Velocity<sup>b</sup></b>               | <b>P=0.017</b>                                                                 | <b>P=0.003</b>                                                                     |
| Valsartan                                    | 0.016 [-0.19, +0.22]                                                           | 0.003 [-0.19, +0.19]                                                               |
| Placebo                                      | -0.33 [-0.57, -0.10]                                                           | -0.37 [-0.56, -0.18]                                                               |
| Difference                                   | 0.35 [+0.06, +0.63]                                                            | 0.37 [+0.12, +0.62]                                                                |
| <b>S' Velocity<sup>b</sup></b>               | <b>P=0.45</b>                                                                  | <b>P=0.39</b>                                                                      |
| Valsartan                                    | -0.031 [-0.28, +0.21]                                                          | -0.05 [-0.30, +0.19]                                                               |
| Placebo                                      | -0.165 [-0.43, +0.10]                                                          | -0.19 [-0.44, +0.05]                                                               |
| Difference                                   | 0.13 [-0.21, +0.48]                                                            | 0.14 [-0.18, +0.46]                                                                |
| <b>LV Mass<sup>c</sup></b>                   | <b>P=0.12</b>                                                                  | <b>P=0.08</b>                                                                      |

|                                            |                      |                      |
|--------------------------------------------|----------------------|----------------------|
| Valsartan                                  | -4.32 [-7.32, -1.32] | -4.68 [-7.65, -1.72] |
| Placebo                                    | -1.11 [-4.04, +1.81] | -1.22 [-4.18, +1.74] |
| Difference                                 | 3.20 [-0.81, +7.22]  | 3.46 [-0.48, +7.40]  |
| <b>LA Volume<sup>c</sup></b>               | <b>P=0.59</b>        | <b>P=0.63</b>        |
| Valsartan                                  | 2.47 [-0.31, +5.25]  | 2.12 [-0.55, +4.79]  |
| Placebo                                    | 1.45 [-1.27, +4.17]  | 1.23 [-1.42, +3.89]  |
| Difference                                 | 1.02 [-2.70, +4.74]  | 0.89 [-2.72, +4.50]  |
| <b>LV End Diastolic Volume<sup>c</sup></b> | <b>P=0.047</b>       | <b>P=0.03</b>        |
| Valsartan                                  | 4.51 [+1.41, +7.61]  | 4.17 [+1.36, +6.97]  |
| Placebo                                    | 0.41 [-2.77, +3.59]  | -0.13 [-2.93, +2.66] |
| Difference                                 | 4.10 [+0.06, +8.14]  | 4.30 [+0.53, +8.07]  |
| <b>LV End Systolic Volume<sup>c</sup></b>  | <b>P=0.24</b>        | <b>P=0.13</b>        |
| Valsartan                                  | 3.69 [+1.77, +5.62]  | 3.65 [+1.86, +5.45]  |
| Placebo                                    | 2.20 [+0.28, +4.13]  | 1.90 [+0.09, +3.71]  |
| Difference                                 | 1.49 [-1.00, +3.97]  | 1.75 [-0.52, +4.03]  |
| <b>NTproBNP<sup>d</sup></b>                | <b>P=0.025</b>       | <b>P=0.033</b>       |
| Valsartan                                  | 0.02 [-0.14, +0.18]  | 0.01 [-0.14, +0.16]  |
| Placebo                                    | 0.27 [+0.11, +0.43]  | 0.25 [+0.10, +0.40]  |
| Difference                                 | -0.25 [-0.47, -0.03] | -0.24 [-0.46, -0.02] |
| <b>Troponin T<sup>d</sup></b>              | <b>P=0.37</b>        | <b>P=0.25</b>        |
| Valsartan                                  | 0.06 [-0.02, +0.14]  | 0.06 [-0.02, +0.14]  |
| Placebo                                    | 0.11 [+0.02, +0.20]  | 0.12 [+0.03, +0.21]  |

|            |                      |                      |
|------------|----------------------|----------------------|
| Difference | -0.05 [-0.16, +0.06] | -0.06 [-0.17, +0.04] |
|------------|----------------------|----------------------|

Sensitivity analyses comparing results of the primary analysis mixed model linear regressions comparing changes in the outcome between treatment groups with and without participants who withdrew from the trial early.

\*Adjusted for the baseline value of the outcome (normalized), NYHA class, sex, age, pubertal status, body mass index, race (white vs not white), genotype (thick vs thin filament variants), LV ejection fraction, systolic blood pressure, beta-blocker use, calcium channel blocker use. Two-sided p-values for secondary outcomes were not adjusted for multiple testing.

<sup>a</sup>Adjusted for body surface area; <sup>b</sup>Adjusted for age; <sup>c</sup>Indexed to body surface area; <sup>d</sup>Log-transformed, with change measured relative to baseline



Table S3. Primary Outcomes Using Original Eligibility Criteria, Omitting LV Volumes in the Composite Outcome, and Omitting Participants with Maximal LV Wall Thickness >20 mm.

| Outcome and Subjects                                                                     | Adjusted Mean Change in Normalized Measure |                                           | Between-Group Differences* | Adjusted P-Value |
|------------------------------------------------------------------------------------------|--------------------------------------------|-------------------------------------------|----------------------------|------------------|
|                                                                                          | Placebo                                    | Valsartan                                 |                            |                  |
| <b>Original Composite Z-Score</b>                                                        | <b>n=90</b><br>-0.095<br>[-0.192, 0.002]   | <b>n=88</b><br>+0.136<br>[+0.049, +0.223] | -0.231<br>[-0.364, -0.098] | 0.001            |
| <b>Original Composite Z-score with original eligibility criteria (Age≤30; MLVWT≤20)*</b> | <b>n=55</b><br>-0.118<br>[-0.247, 0.012]   | <b>n=49</b><br>+0.170<br>[+0.049, +0.290] | -0.287<br>[-0.468, -0.107] | 0.002            |
| <b>Composite Z-Score, Omitting LVEDV and LVESV components</b>                            | <b>n=90</b><br>-0.094<br>[-0.211, +0.022]  | <b>n=88</b><br>+0.113<br>[+0.004, +0.221] | -0.207<br>[-0.366, -0.048] | 0.011            |
| <b>Composite Z-Score, Omitting Patients with MLVWT&gt;20 mm</b>                          | <b>n=81</b><br>-0.107<br>[-0.210, -0.003]  | <b>n=66</b><br>+0.161<br>[+0.059, +0.264] | -0.268<br>[-0.416, -0.119] | 0.001            |

Sensitivity analyses comparing results of the primary analysis mixed model linear regressions comparing changes in the outcome between treatment groups with original eligibility criteria, omitting LV volume components of the primary composite outcome, and omitting participants with severe hypertrophy (maximal LV thickness >20 mm) \*Eligibility criteria were revised once early during trial enrollment, increasing the upper age limit from 30 to 45 years, and maximal left ventricular wall thickness from 20 to 25 mm. Sample size decreased from 178 to 104; the majority due to the change in the age limit. p-values are 2-sided.

MLVWT, maximal left ventricular wall thickness; LVEDV, left ventricular end diastolic volume; LVESV, left ventricular end systolic volume.

Table S4. Proportion of Participants Showing Improvement for Primary and Secondary Outcomes

| Outcome                                                                 | Adjusted Improvement Rates* |           | Adjusted Odds Ratio 95% CI and p-value |
|-------------------------------------------------------------------------|-----------------------------|-----------|----------------------------------------|
|                                                                         | Placebo                     | Valsartan |                                        |
| Improvement on any component <sup>†</sup>                               | 91%                         | 95%       | 2.05 [0.59, 7.07] p=0.37               |
|                                                                         |                             |           |                                        |
| Number of Components that Showed Improvement                            | 3.8                         | 4.7       | 1.5 [1.2, 1.9] p<0.001                 |
| <b>Proportion with Improvement in Components of the Primary Outcome</b> |                             |           |                                        |
| Maximum LV Wall Thickness <sup>a</sup>                                  | 34%                         | 52%       | 2.09 [1.09, 4.01] p=0.03               |
| E' Velocity <sup>b</sup>                                                | 31%                         | 53%       | 2.59 [1.33, 5.05] p=0.005              |
| S' Velocity <sup>b</sup>                                                | 35%                         | 49%       | 1.79 [0.88, 3.67] p=0.11               |
| LV Mass <sup>c</sup>                                                    | 56%                         | 69%       | 1.81 [0.90, 3.63] p=0.10               |
| LA Volume <sup>c</sup>                                                  | 49%                         | 44%       | 0.82 [0.41, 1.63] p=0.57               |
| LV End Diastolic Volume <sup>c</sup>                                    | 56%                         | 70%       | 1.81 [0.80, 4.10] p=0.15               |
| LV End Systolic Volume <sup>c</sup>                                     | 69%                         | 66%       | 0.85 [0.41, 1.75] p=0.66               |
| NTproBNP <sup>d</sup>                                                   | 33%                         | 47%       | 1.80 [0.89, 3.65] p=0.10               |
| Troponin T <sup>d</sup>                                                 | 10%                         | 14%       | 1.43 [0.48, 4.31] p=0.52               |

Each subject was scored as a “success” or “failure” based on improvement in any individual metric at 24 months. Successes and failures were compared between treatment groups using Fisher’s exact test, through a mixed effects logistic regression adjusting for correlations and \*adjusted for the baseline value of the outcome (normalized), sex, age, pubertal status, body mass index, LV ejection fraction, systolic blood pressure and maximum left ventricular wall thickness. Two-sided p-values for secondary outcomes were not adjusted for multiple testing.

<sup>†</sup>Unadjusted and based on unimputed data; too few people had no successes to model. <sup>a</sup>Adjusted for body surface area; <sup>b</sup>Adjusted for age; <sup>c</sup>Indexed to body surface area;

<sup>d</sup>Log-transformed, with change measured relative to baseline

Table S5. Prespecified Subgroup Analyses

**All Patients (n=178):**

|                                              | Within-Group Changes in the Normalized Measures* |                                 | Between-Group Differences*     | Adjusted* P-Value |
|----------------------------------------------|--------------------------------------------------|---------------------------------|--------------------------------|-------------------|
|                                              | Placebo (n=90)                                   | Valsartan n=88)                 |                                |                   |
| <b>Composite Z-Score</b>                     | <b>-0.095</b><br>[-0.192, 0.002]                 | <b>+0.136</b><br>[0.049, 0.223] | <b>0.231</b><br>[0.098, 0.364] | <b>0.001</b>      |
| <b>Maximum LV Wall Thickness<sup>a</sup></b> | 1.32<br>[+0.42, +2.21]                           | 0.16<br>[-0.69, +1.00]          | -1.16<br>[-2.37, +0.06]        | 0.062             |
| <b>E' Velocity<sup>b</sup></b>               | -0.33<br>[-0.57, -0.10]                          | 0.016<br>[-0.19, +0.22]         | 0.35<br>[+0.06, +0.63]         | 0.017             |
| <b>LV End Diastolic Volume<sup>c</sup></b>   | 0.41<br>[-2.77, +3.59]                           | 4.51<br>[+1.41, +7.61]          | 4.10<br>[+0.06, +8.14]         | 0.047             |
| <b>NTproBNP<sup>d</sup></b>                  | 0.27<br>[+0.11, +0.43]                           | 0.02<br>[-0.14, +0.18]          | -0.25<br>[-0.47, -0.03]        | 0.025             |

\*Adjusted for the baseline value of the outcome (normalized), sex, age, pubertal status, body mass index, LV ejection fraction, systolic blood pressure and maximum left ventricular wall thickness. Two-sided p-values for secondary outcomes were not adjusted for multiple testing.

†Unadjusted and based on unimputed data; too few people had no successes to model. <sup>a</sup>Adjusted for body surface area; <sup>b</sup>Adjusted for age; <sup>c</sup>Indexed to body surface area; <sup>d</sup>Log-transformed, with change measured relative to baseline

**By Sex:**

| Male (n=109)                                 | Within-Group Changes in the Normalized Measures* |                           | Between-Group Differences* | Adjusted* P-Value |
|----------------------------------------------|--------------------------------------------------|---------------------------|----------------------------|-------------------|
|                                              | Placebo (n=55)                                   | Valsartan (n=54)          |                            |                   |
| <b>Composite Z-Score</b>                     | -0.106<br>[-0.237, 0.025]                        | +0.102<br>[-0.011, 0.215] | 0.208<br>[0.021, 0.396]    | 0.030             |
| <b>Maximum LV Wall Thickness<sup>a</sup></b> | 1.44<br>[+0.23, +2.65]                           | 0.62<br>[-0.48, +1.70]    | -0.83<br>[-2.47, +0.81]    | 0.32              |
| <b>E' Velocity<sup>b</sup></b>               | -0.28<br>[-0.61, +0.05]                          | -0.10<br>[-0.38, +0.19]   | 0.19<br>[-0.24, +0.61]     | 0.39              |
| <b>LV End Diastolic Volume<sup>c</sup></b>   | -0.59<br>[-4.53, +3.36]                          | 4.02<br>[+0.12, +7.93]    | 4.61<br>[-0.76, +9.98]     | 0.09              |
| <b>NTproBNP<sup>d</sup></b>                  | 0.26<br>[+0.01, +0.51]                           | -0.09<br>[-0.34, +0.15]   | -0.36<br>[-0.66, -0.05]    | 0.02              |

| Female (n=69)                                | Within-Group Changes in the Normalized Measures* |                          | Between-Group Differences* | Adjusted* P-Value |
|----------------------------------------------|--------------------------------------------------|--------------------------|----------------------------|-------------------|
|                                              | Placebo (n=35)                                   | Valsartan (n=34)         |                            |                   |
| <b>Composite Z-Score</b>                     | -0.088<br>[-0.241, 0.064]                        | +0.198<br>[0.052, 0.345] | 0.287<br>[0.066, 0.507]    | 0.011             |
| <b>Maximum LV Wall Thickness<sup>a</sup></b> | 1.44<br>[-0.11, +3.00]                           | -0.85<br>[-2.37, +0.67]  | -2.29<br>[-4.54, -0.05]    | 0.046             |

|                                            |                         |                        |                         |      |
|--------------------------------------------|-------------------------|------------------------|-------------------------|------|
| <b>E' Velocity<sup>b</sup></b>             | -0.42<br>[-0.79, -0.04] | 0.29<br>[-0.07, +0.06] | 0.70<br>[+0.16, +1.24]  | 0.01 |
| <b>LV End Diastolic Volume<sup>c</sup></b> | 0.56<br>[-3.56, +4.69]  | 5.71<br>[+1.70, +9.72] | 5.15<br>[-0.56, +10.86] | 0.08 |
| <b>NTproBNP<sup>d</sup></b>                | 0.36<br>[+0.13, +0.59]  | 0.21<br>[-0.01, +0.43] | -0.15<br>[-0.49, +0.20] | 0.41 |

**By Baseline Age Group:**

| Ages ≤ 18 (n=77)                             | Within-Group Changes in the Normalized Measures* |                          | Between-Group Differences* | Adjusted* P-Value |
|----------------------------------------------|--------------------------------------------------|--------------------------|----------------------------|-------------------|
|                                              | Placebo (n=39)                                   | Valsartan (n=38)         |                            |                   |
| <b>Composite Z-Score</b>                     | -0.148<br>[-0.302, 0.007]                        | +0.093<br>[0.043, 0.230] | 0.241<br>[0.041, 0.441]    | 0.019             |
| <b>Maximum LV Wall Thickness<sup>a</sup></b> | 1.43<br>[-0.06, +2.93]                           | 0.67<br>[-0.74, +2.07]   | -0.77<br>[-2.43, +0.90]    | 0.37              |
| <b>E' Velocity<sup>b</sup></b>               | -0.39<br>[-0.85, +0.07]                          | -0.18<br>[-0.58, +0.21]  | 0.20<br>[-0.36, +0.77]     | 0.48              |
| <b>LV End Diastolic Volume<sup>c</sup></b>   | -1.03<br>[-6.24, +4.18]                          | 5.69<br>[+1.24, +10.13]  | 6.72<br>[-0.30, +13.14]    | 0.04              |
| <b>NTproBNP<sup>d</sup></b>                  | 0.21<br>[-0.01, +0.55]                           | 0.04<br>[-0.22, +0.31]   | -0.23<br>[-0.63, +0.17]    | 0.27              |
| Ages > 18 (n=101)                            | Within-Group Changes in the Normalized Measures* |                          | Between-Group Differences* | Adjusted* P-Value |
|                                              | Placebo (n=51)                                   | Valsartan (n=50)         |                            |                   |
| <b>Composite Z-Score</b>                     | -0.034<br>[-0.158, 0.089]                        | +0.154<br>[0.027, 0.281] | 0.189<br>[0.014, 0.363]    | 0.034             |
| <b>Maximum LV Wall Thickness<sup>a</sup></b> | 0.82<br>[-0.44, +2.08]                           | 0.11<br>[-1.17, +1.40]   | -0.71<br>[-2.42, +1.01]    | 0.42              |
| <b>E' Velocity<sup>b</sup></b>               | -0.26<br>[-0.51, -0.02]                          | 0.16<br>[-0.07, +0.40]   | 0.43<br>[+0.12, +0.73]     | 0.01              |
| <b>LV End Diastolic Volume<sup>c</sup></b>   | 2.52<br>[-1.21, +6.25]                           | 2.42<br>[-1.37, +6.20]   | -0.10<br>[-5.19, +4.98]    | 0.97              |
| <b>NTproBNP<sup>d</sup></b>                  | 0.25<br>[+0.06, +0.44]                           | 0.01<br>[-0.19, +0.22]   | -0.24<br>[-0.53, +0.06]    | 0.11              |

**By Baseline Maximal Left Ventricular Wall Thickness:**

| BSA-adjusted Z-score ≤7.3 (n=89)             | Within-Group Changes in the Normalized Measures* |                          | Between-Group Differences* | Adjusted* P-Value |
|----------------------------------------------|--------------------------------------------------|--------------------------|----------------------------|-------------------|
|                                              | Placebo (n=48)                                   | Valsartan (n=41)         |                            |                   |
| <b>Composite Z-Score</b>                     | -0.143<br>[-0.289, 0.001]                        | +0.225<br>[0.083, 0.368] | 0.368<br>[0.169, 0.567]    | 0.0003            |
| <b>Maximum LV Wall Thickness<sup>a</sup></b> | 1.21<br>[+0.04, +2.38]                           | -0.43<br>[-1.62, +0.76]  | -1.64<br>[-3.27, -0.01]    | 0.048             |

|                                            |                         |                         |                         |      |
|--------------------------------------------|-------------------------|-------------------------|-------------------------|------|
| <b>E' Velocity<sup>b</sup></b>             | -0.55<br>[-0.91, -0.19] | -0.15<br>[-0.22, +0.52] | 0.70<br>[+0.20, +1.20]  | 0.01 |
| <b>LV End Diastolic Volume<sup>c</sup></b> | -0.09<br>[-4.50, +4.31] | 6.52<br>[+2.12, +10.91] | 6.61<br>[+1.71, +11.51] | 0.01 |
| <b>NTproBNP<sup>d</sup></b>                | 0.30<br>[+0.06, +0.53]  | -0.01<br>[-0.27, +0.24] | -0.31<br>[-0.68, +0.06] | 0.10 |

| <b>BSA-adjusted Z-score &gt;7.3 (n=89)</b>   | <b>Within-Group Changes in the Normalized Measures*</b> |                           | <b>Between-Group Differences*</b> | <b>Adjusted* P-Value</b> |
|----------------------------------------------|---------------------------------------------------------|---------------------------|-----------------------------------|--------------------------|
|                                              | <b>Placebo (n=42)</b>                                   | <b>Valsartan (n=47)</b>   |                                   |                          |
| <b>Composite Z-Score</b>                     | -0.027<br>[-0.167, 0.112]                               | +0.039<br>[-0.081, 0.159] | 0.069<br>[-0.115, 0.249]          | 0.471                    |
| <b>Maximum LV Wall Thickness<sup>a</sup></b> | 1.29<br>[-0.18, +2.77]                                  | 0.74<br>[-0.60, +2.08]    | -0.55<br>[-2.57, +1.47]           | 0.59                     |
| <b>E' Velocity<sup>b</sup></b>               | -0.11<br>[-0.41, +0.19]                                 | -0.04<br>[-0.29, +0.20]   | 0.07<br>[-0.30, +0.44]            | 0.71                     |
| <b>LV End Diastolic Volume<sup>c</sup></b>   | 1.68<br>[-4.05, +7.41]                                  | 2.08<br>[-3.69, +7.85]    | -0.40<br>[-6.68, +7.48]           | 0.91                     |
| <b>NTproBNP<sup>d</sup></b>                  | 0.23<br>[-0.01, +0.47]                                  | 0.07<br>[-0.15, +0.30]    | -0.16<br>[-0.46, +0.15]           | 0.31                     |

**By Disease-Causing Gene:**

| <b>MYBPC3 (n=91)</b>                         | <b>Within-Group Changes in the Normalized Measures*</b> |                          | <b>Between-Group Differences*</b> | <b>Adjusted* P-Value</b> |
|----------------------------------------------|---------------------------------------------------------|--------------------------|-----------------------------------|--------------------------|
|                                              | <b>Placebo (n=44)</b>                                   | <b>Valsartan (n=47)</b>  |                                   |                          |
| <b>Composite Z-Score</b>                     | +0.005<br>[-0.140, 0.150]                               | +0.142<br>[0.018, 0.266] | 0.137<br>[-0.052, 0.327]          | 0.155                    |
| <b>Maximum LV Wall Thickness<sup>a</sup></b> | +0.50<br>[-0.85, +1.86]                                 | +0.22<br>[-0.99, +1.44]  | -0.28<br>[-2.01, +1.46]           | 0.75                     |
| <b>E' Velocity<sup>b</sup></b>               | -0.30<br>[-0.68, +0.07]                                 | -0.05<br>[-0.34, +0.25]  | 0.26<br>[-0.21, +0.73]            | 0.28                     |
| <b>LV End Diastolic Volume<sup>c</sup></b>   | -1.18<br>[-6.39, +4.03]                                 | +4.45<br>[+0.08, +8.82]  | 5.63<br>[+1.15, +12.41]           | 0.10                     |
| <b>NTproBNP<sup>d</sup></b>                  | +0.19<br>[-0.05, +0.44]                                 | +0.08<br>[-0.15, +0.31]  | -0.11<br>[-0.46, +0.23]           | 0.53                     |

| <b>MYH7 (n=61)</b>                           | <b>Within-Group Changes in the Normalized Measures*</b> |                           | <b>Between-Group Differences*</b> | <b>Adjusted* P-Value</b> |
|----------------------------------------------|---------------------------------------------------------|---------------------------|-----------------------------------|--------------------------|
|                                              | <b>Placebo (n=36)</b>                                   | <b>Valsartan (n=25)</b>   |                                   |                          |
| <b>Composite Z-Score</b>                     | -0.127<br>[-0.316, 0.063]                               | +0.142<br>[-0.063, 0.346] | 0.268<br>[-0.053, 0.483]          | 0.015                    |
| <b>Maximum LV Wall Thickness<sup>a</sup></b> | 1.65<br>[+0.12, +3.19]                                  | -0.19<br>[-1.91, +1.54]   | -1.84<br>[-3.86, +0.18]           | 0.07                     |

|                                            |                         |                         |                         |      |
|--------------------------------------------|-------------------------|-------------------------|-------------------------|------|
| <b>E' Velocity<sup>b</sup></b>             | -0.45<br>[-0.79, -0.11] | +0.03<br>[-0.35, +0.40] | 0.48<br>[+0.06, +0.90]  | 0.02 |
| <b>LV End Diastolic Volume<sup>c</sup></b> | 1.72<br>[-2.41, +5.85]  | 3.65<br>[-1.05, +8.36]  | 1.93<br>[-4.14, +8.01]  | 0.53 |
| <b>NTproBNP<sup>d</sup></b>                | 0.31<br>[+0.05, +0.57]  | 0.02<br>[-0.26, +0.31]  | -0.29<br>[-0.63, +0.05] | 0.10 |

### Subgroup Interaction P-values

| Subgroups                          | Outcome           |                           |                  |                         |          |
|------------------------------------|-------------------|---------------------------|------------------|-------------------------|----------|
|                                    | Primary Composite | Maximum LV Wall Thickness | E-Prime Velocity | LV End Diastolic Volume | NTproBNP |
| Male vs Female                     | P=0.48            | P=0.55                    | P=0.08           | P=0.59                  | P=0.45   |
| Age ≤ 18 vs Age > 18               | P=0.81            | P=0.68                    | P=0.89           | P=0.048                 | P=0.68   |
| Max LVWTz ≤ 7.3 vs Max LVWTz > 7.3 | P=0.04            | P=0.58                    | P=0.08           | P=0.16                  | P=0.54   |
| MYBPC3 vs MYH7                     | P=0.59            | P=0.52                    | P=0.71           | P=0.53                  | P=0.62   |

Prespecified subgroup analyses assessed the influence of sex, genotype (*MYH7* vs *MYBPC3* variants), and other baseline characteristics on treatment response. Multivariable analyses were performed using formal interaction terms in linear regression models for the primary composite z-score outcome.

Table S6. Adjusted changes in Blood Pressure, Serum Creatinine, and Serum Potassium

|                                | Adjusted* Mean Change in Raw Measure |                         | Between-Group Differences*        |
|--------------------------------|--------------------------------------|-------------------------|-----------------------------------|
|                                | Placebo (n=90)                       | Valsartan (n=88)        |                                   |
| Systolic Blood Pressure, mmHg  | +1.2<br>[-1.3, +3.7]                 | -2.1<br>[-4.6, +0.4]    | -3.3<br>[-6.9, +0.2]<br>P=0.07    |
| Diastolic Blood Pressure, mmHg | +1.5<br>[-0.5, 3.5]                  | -2.6<br>[-4.6, -0.6]    | -4.1<br>[-6.8, -1.3]<br>P=0.004   |
| Creatinine, mg/dL              | +0.03<br>[-0.01, +0.07]              | +0.02<br>[-0.02, +0.06] | -0.01<br>[-0.06, +0.04]<br>P=0.65 |
| Potassium, mmol/L              | +0.02<br>[-0.06, +0.10]              | +0.04<br>[-0.04, +0.11] | +0.01<br>[-0.09, +0.12]<br>P=0.79 |

\*Mean change at Year 2 compared with baseline, adjusted for the baseline value of the outcome, NYHA class, maximum LV wall thickness, sex, age, pubertal status, body mass index, race (white vs not white), Hispanic ethnicity, genotype (thick vs thin filament variants), LV ejection fraction, systolic blood pressure, beta-blocker use, calcium channel blocker use. Between group difference = valsartan-placebo. Missing data were imputed.

Table S7. Adverse Events

| Placebo (n=90)                                         | Valsartan (n=88)                                |
|--------------------------------------------------------|-------------------------------------------------|
| <b>All Adverse Events</b>                              |                                                 |
| 98 Adverse Events in 48 People                         | 128 Adverse Events in 51 People                 |
| 42 (47%) people with no AE                             | 37 (42%) people with no AE                      |
| 29% with 1 AE                                          | 17% with 1 AE                                   |
| 10% with 2 AE's                                        | 20% with 2 AE's                                 |
| 14% with 3 or more AE's                                | 21% with 3 or more AE's                         |
| <b>Relationship to HCM</b>                             |                                                 |
| 30 of 98 AE's related to HCM (31%)                     | 30 of 128 AE's related to HCM (23%)             |
| <b>Relationship to Drug</b>                            |                                                 |
| Not Related: 65 (66%)                                  | Not Related: 70 (55%)                           |
| Possibly Related: 29 (30%)                             | Possibly Related: 56 (44%)                      |
| Probably Related: 4 (4%)                               | Probably Related: 1 (1%)                        |
| Definitely Related: 0 (0%)                             | Definitely Related: 1 (1%)                      |
| (Probably: New murmur, MVR / severity=1)               | (Probably: Headache / severity=1)               |
| (Probably: Hypotension / severity=1)                   | (Definitely: Postural hypotension / severity=1) |
| (Probably: Elevated creatinine / severity=1)           |                                                 |
| (Probably: Creatinine clearance decrease / severity=1) |                                                 |
| <b>Severity</b>                                        |                                                 |
| Mild: 65 (66%)                                         | Mild: 98 (77%)                                  |



|                                                                                             |                                                                           |
|---------------------------------------------------------------------------------------------|---------------------------------------------------------------------------|
| Moderate: 21 (21%)                                                                          | Moderate: 24 (19%)                                                        |
| Severe: 11 (11%)                                                                            | Severe: 5 (4%)                                                            |
| Life-Threatening: 1 (1%) (Syncope)                                                          | Life-Threatening: 0 (0%)                                                  |
| Death: 0 (0%)                                                                               | Death: 1 (1%) (pedestrian accident)                                       |
| <b>Serious Adverse Events</b>                                                               |                                                                           |
| 14 Serious Adverse Events in 10 People                                                      | 8 Serious Adverse Events in 8 People                                      |
| 7 of 14 SAE's are related to HCM (50%)                                                      | 4 of 8 SAE's are related to HCM (50%)                                     |
| 0 out of 14 related to Drug                                                                 | 1 out of 8 SAE's possibly related to Drug                                 |
|                                                                                             |                                                                           |
| #1: Cervical cancer / unrelated HCM/ severity=3<br>Hysterectomy / unrelated HCM/ severity=3 | #1: Death (pedestrian accident) / unrelated HCM/<br>severity=5            |
| #2: Hospitalization for Depression /unrelated<br>HCM/ severity=2                            | #2: ICD placement / related HCM/ severity=3                               |
| #3: Viral syndrome / unrelated HCM/ severity=3                                              | #3: Syncope / related HCM/ severity=2                                     |
| #4: ICD placement / related HCM/ severity=2<br>ICD malfunction / unrelated HCM/ severity=1  | #4: Palpitations / related HCM/ severity=2                                |
| #5: Syncope / related HCM/ severity=4<br>ICD placement / related HCM/ severity=3            | #5: PVCs / unrelated HCM/ severity=1                                      |
| #6: Syncope / unrelated HCM/ severity=2                                                     | #6: Sepsis / unrelated HCM/ severity=3                                    |
| #7: Profound anemia / unrelated HCM/ severity=3                                             | #7: Pregnancy / unrelated HCM/ severity=3                                 |
| #8: ICD placement / related HCM/ severity=3                                                 | #8: Chest pain / unrelated HCM / possibly related<br>to Drug / severity=1 |

|                                                                                                               |  |
|---------------------------------------------------------------------------------------------------------------|--|
| #9: Inducible ventricular tachycardia /related HCM/ severity=3<br><br>ICD placement / related HCM/ severity=3 |  |
| #10: Chest pain admit /related HCM/ severity=3                                                                |  |

Table S8. Genetic Variants in VANISH Participants

| Group   | Gene   | Variant (c.)             | Variant (p.)      | N |
|---------|--------|--------------------------|-------------------|---|
| Placebo | ACTC   | 889G>T                   | Ala297Ser         | 1 |
| Placebo | MYBPC3 | 2308 G>A                 | Asp770Asn         | 1 |
| Placebo | MYBPC3 | 2454 G>A                 | Trp818Ter         | 1 |
| Placebo | MYBPC3 | 2550 delC                | Asn850LysfsX29    | 1 |
| Placebo | MYBPC3 | 2864_2865delct           | Pro955fs          | 1 |
| Placebo | MYBPC3 | 3330+2T>C                |                   | 2 |
| Placebo | MYBPC3 | 3414dupC                 | Val1139ArgfsTer10 | 2 |
| Placebo | MYBPC3 | 3662del T                | Leu1221Argfs*19   | 1 |
| Placebo | MYBPC3 | 772 G>A                  | Glu258Lys         | 5 |
| Placebo | MYBPC3 | 1892delT                 | Phe631fs          | 3 |
| Placebo | MYBPC3 | 1153_1168delGTGGAAGCTGGC | Val385Metfs       | 1 |
| Placebo | MYBPC3 | 1310delT                 | Val437Glyfs       | 2 |
| Placebo | MYBPC3 | 1504C>T                  | Arg502Trp         | 2 |
| Placebo | MYBPC3 | 1509 C>G                 | Phe503Leu         | 1 |
| Placebo | MYBPC3 | 1624G>C                  | Glu542Gln         | 1 |
| Placebo | MYBPC3 | 1928-2A>G                |                   | 2 |
| Placebo | MYBPC3 | 2048G>A                  | Trp683X           | 1 |
| Placebo | MYBPC3 | 2170C>T                  | Arg724Trp         | 1 |
| Placebo | MYBPC3 | 2308 G>A                 | Asp770Asn         | 1 |
| Placebo | MYBPC3 | 2490insT                 | Ser830fsX832      | 1 |
| Placebo | MYBPC3 | 2670G>A                  | Trp890X           | 2 |
| Placebo | MYBPC3 | 2774-2775delAG           | Glu925fs1094X     | 1 |
| Placebo | MYBPC3 | 2905+1G>A                |                   | 1 |
| Placebo | MYBPC3 | 3124_3125insAA           | Thr1042LysfsX     | 2 |
| Placebo | MYBPC3 | 3330+2T>G                |                   | 3 |
| Placebo | MYBPC3 | 3330+5 G>C               |                   | 1 |
| Placebo | MYBPC3 | 3697C>T                  | Gln1233X          | 1 |
| Placebo | MYBPC3 | 821+1G>A                 |                   | 2 |
| Placebo | MYH7   | 1012G>A                  | Val338Met         | 2 |
| Placebo | MYH7   | 2191 C>T                 | Pro731Ser         | 3 |
| Placebo | MYH7   | 2524 A>G                 | Ser842Gly         | 1 |
| Placebo | MYH7   | 2555T>C                  | Met852Thr         | 1 |
| Placebo | MYH7   | 5135G>A                  | Arg1712Gln        | 1 |
| Placebo | MYH7   | 746 G>A                  | Arg249Gln         | 1 |
| Placebo | MYH7   | 1477 A>G                 | Met493Val         | 1 |
| Placebo | MYH7   | 1491 G>T                 | Glu497Asp         | 1 |
| Placebo | MYH7   | 1505A>G                  | Lys502Arg         | 1 |
| Placebo | MYH7   | 170 C>A                  | Ala57Asp          | 1 |

|           |        |               |           |   |
|-----------|--------|---------------|-----------|---|
| Placebo   | MYH7   | 1816 G>A      | Val606Met | 3 |
| Placebo   | MYH7   | 1954A>G       | Arg652Gly | 1 |
| Placebo   | MYH7   | 1987C>T       | Arg663Cys | 1 |
| Placebo   | MYH7   | 1988G>A       | Arg663His | 5 |
| Placebo   | MYH7   | 2104A> G      | Ile702Val | 1 |
| Placebo   | MYH7   | 2156G>A       | Arg719Gln | 2 |
| Placebo   | MYH7   | 2167C>T       | Arg723Cys | 3 |
| Placebo   | MYH7   | 2389G>A       | Ala797Thr | 1 |
| Placebo   | MYH7   | 2544G>C       | Glu848Asp | 1 |
| Placebo   | MYH7   | 2609G>A       | Arg870His | 2 |
| Placebo   | MYH7   | 2788 G>A      | Glu930Lys | 1 |
| Placebo   | MYH7   | 968T>A        | Ile323Asn | 1 |
| Placebo   | MYH7   | 1750G>C       | Gly584Arg | 1 |
| Placebo   | MYL2   | 239C>A        | Thr80Asn  | 1 |
| Placebo   | MYL3   | 170C>A        | Ala57Asp  | 1 |
| Placebo   | MYL3   | 445A>G        | Met149Val | 1 |
| Placebo   | TNNI3  | 592 C>G       | Leu198Val | 2 |
| Placebo   | TNNT2  | 856 C>T       | Arg286Cys | 1 |
| Placebo   | TNNT2  | 274C>T        | Arg92Trp  | 1 |
| Placebo   | TNNT2  | 821+1G>T      |           | 1 |
| Placebo   | TPM1   | 457 C>G       | His153Asp | 1 |
| Valsartan | ACTC   | 301G>A        | Glu101Lys | 2 |
| Valsartan | MYBPC3 | 1484G>A       | Arg495Gln | 1 |
| Valsartan | MYBPC3 | 1624G>C       | Glu542Gln | 1 |
| Valsartan | MYBPC3 | 1678delG      | Asp560fs  | 1 |
| Valsartan | MYBPC3 | 1790G>A       | Arg597Gln | 1 |
| Valsartan | MYBPC3 | 1928-2A>G     |           | 4 |
| Valsartan | MYBPC3 | 2429G>A       | Arg810His | 1 |
| Valsartan | MYBPC3 | 671_673delTGC | Leu224del | 1 |
| Valsartan | MYBPC3 | 772 G>A       | Glu258Lys | 2 |
| Valsartan | MYBPC3 | 3330+T>G      |           | 1 |
| Valsartan | MYBPC3 | 1210C>T       | Gln404X   | 1 |
| Valsartan | MYBPC3 | 1090G>C       | Ala364Pro | 1 |
| Valsartan | MYBPC3 | 1504C>T       | Arg502Trp | 1 |
| Valsartan | MYBPC3 | 1509 C>G      | Phe503Leu | 1 |
| Valsartan | MYBPC3 | 177_187del    | Glu60fs   | 1 |
| Valsartan | MYBPC3 | 1892delT      | Phe631fs  | 1 |
| Valsartan | MYBPC3 | 2308 G>A      | Asp770Asn | 3 |
| Valsartan | MYBPC3 | 2373_2374insG | Trp792fs  | 1 |
| Valsartan | MYBPC3 | 2374 T>C      | Trp792Arg | 2 |
| Valsartan | MYBPC3 | 2454G>A       | Trp818X   | 1 |

|           |        |                        |               |   |
|-----------|--------|------------------------|---------------|---|
| Valsartan | MYBPC3 | 2490dupT               | His831Serfs   | 1 |
| Valsartan | MYBPC3 | 2541C>G                | Tyr847X       | 1 |
| Valsartan | MYBPC3 | 2827C>T                | Arg943X       | 1 |
| Valsartan | MYBPC3 | 2864_2865delCT         | Pro955Argfs   | 1 |
| Valsartan | MYBPC3 | 3079delGinsAA          | Asp10271Lysfs | 1 |
| Valsartan | MYBPC3 | 3192_3193insC          | Lys1065fs     | 1 |
| Valsartan | MYBPC3 | 3330+2T>G              |               | 4 |
| Valsartan | MYBPC3 | 3491-14_3491-8dCCTGTCA |               | 1 |
| Valsartan | MYBPC3 | 3624delC               | Lys1209SerfsX | 1 |
| Valsartan | MYBPC3 | 3697 C>T               | Gln1233X      | 1 |
| Valsartan | MYBPC3 | 436dupA                | Thr146AsnfsX  | 1 |
| Valsartan | MYBPC3 | 459delC                | Ile154LeufsX  | 2 |
| Valsartan | MYBPC3 | 821+1G>A               |               | 1 |
| Valsartan | MYBPC3 | 927-2A>G               |               | 3 |
| Valsartan | MYBPC3 | 177-187 del            | Glu60fs       | 1 |
| Valsartan | MYH7   | 1012G>A                | Val338Met     | 1 |
| Valsartan | MYH7   | 1052A>C                | Lys351Thr     | 1 |
| Valsartan | MYH7   | 2191 C>T               | Pro731Ser     | 1 |
| Valsartan | MYH7   | 2201A>C                | Gln734Pro     | 1 |
| Valsartan | MYH7   | 2334C>G                | Asp778Glu     | 1 |
| Valsartan | MYH7   | 1208g>a                | Arg403G1n     | 1 |
| Valsartan | MYH7   | 1987 C>T               | Arg663Cys     | 5 |
| Valsartan | MYH7   | 2156G>A                | Arg719Gln     | 3 |
| Valsartan | MYH7   | 2221 G>T               | Gly741Trp     | 2 |
| Valsartan | MYH7   | 2681A>G                | Glu849Gly     | 1 |
| Valsartan | MYH7   | 2770G>A                | Glu924Lys     | 2 |
| Valsartan | MYH7   | 2788 G>A               | Glu930Lys     | 1 |
| Valsartan | MYH7   | 2788 G>C               | Glu930Gln     | 1 |
| Valsartan | MYH7   | 4135G>A                | Ala1379Thr    | 1 |
| Valsartan | MYH7   | 746G>A                 | Arg249Gln     | 2 |
| Valsartan | MYL2   | 45_46delinsT           | Asn16fs       | 1 |
| Valsartan | MYL3   | 445A>G                 | Met149Val     | 1 |
| Valsartan | TNNI3  | 431T>C                 | Leu144Pro     | 2 |
| Valsartan | TNNI3  | 484C>T                 | Arg162Trp     | 1 |
| Valsartan | TNNT2  | 236 T>A                | Ile79Asn      | 3 |
| Valsartan | TNNT2  | 856C>T                 | Arg286Cys     | 1 |
| Valsartan | TNNT2  | 487_489delGAG          | Glu163del     | 1 |
| Valsartan | TPM1   | 457C>G                 | His153Asp     | 2 |
| Valsartan | TPM1   | 523G>A                 | Asp175Asn     | 1 |
| Valsartan | TPM1   | 673A>G                 | Ile225Val     | 1 |

Table S9. Eligibility Criteria for the VANISH Trial

| Inclusion Criteria                                                                                                                                                                                                                                                                                                                                                                                                                 | Exclusion Criteria                                                                                                                                                                                                                                                                                                                                                                                                                                                                                                                                                                                                                                                                                                                                                                                                                                                                                                                                                                                                                                                                                                                                                                                                                                                                                                                                                                                                                                                                                                                               |
|------------------------------------------------------------------------------------------------------------------------------------------------------------------------------------------------------------------------------------------------------------------------------------------------------------------------------------------------------------------------------------------------------------------------------------|--------------------------------------------------------------------------------------------------------------------------------------------------------------------------------------------------------------------------------------------------------------------------------------------------------------------------------------------------------------------------------------------------------------------------------------------------------------------------------------------------------------------------------------------------------------------------------------------------------------------------------------------------------------------------------------------------------------------------------------------------------------------------------------------------------------------------------------------------------------------------------------------------------------------------------------------------------------------------------------------------------------------------------------------------------------------------------------------------------------------------------------------------------------------------------------------------------------------------------------------------------------------------------------------------------------------------------------------------------------------------------------------------------------------------------------------------------------------------------------------------------------------------------------------------|
| <ol style="list-style-type: none"> <li>1. Age 8 to 45 years</li> <li>2. LV wall thickness <math>\geq 12</math> mm and <math>\leq 25</math> mm or z-score <math>\geq 3</math> and <math>\leq 18</math> as determined by rapid assessment by the echocardiographic core laboratory</li> <li>3. NYHA functional class I or II</li> <li>4. No resting or provoked LV obstruction (peak gradient <math>\leq 30</math> mm Hg)</li> </ol> | <ol style="list-style-type: none"> <li>1. Contraindication to angiotensin receptor blocker (ARB) administration</li> <li>2. Medical conditions that may confound interpretation of biomarkers of collagen synthesis (fibrosis, inflammatory states, cancer, trauma or surgery within 6 months of enrollment)</li> <li>3. Concomitant use of spironolactone, lithium, aliskiren, ARB, or angiotensin converting enzyme (ACE)-inhibitors.</li> <li>4. Pregnant or breastfeeding women or women of childbearing potential with no effective contraceptive method</li> <li>5. Uncontrolled systemic arterial hypertension (persistent systolic blood pressure <math>&gt;160</math> mmHg and/or diastolic blood pressure <math>&gt;90</math> mmHg in adults or equivalent in children [e.g., systolic blood pressure <math>&gt;99</math>th or diastolic blood pressure <math>&gt;95</math>th percentile for sex, age, and height centile based on the American Academy of Pediatrics normal values])</li> <li>6. Prior septal myectomy, alcohol septal ablation, or treatment for symptomatic heart failure</li> <li>7. Known or suspected coronary artery disease or evidence of prior myocardial infarction based on symptoms or cardiac imaging</li> <li>8. More than mild valvular heart disease, clinically relevant congenital heart disease, or left ventricular ejection fraction (LVEF) <math>&lt;55\%</math></li> <li>9. Secondary prevention implantable cardioverter-defibrillator (ICD) or history of appropriate ICD therapy</li> </ol> |

Table S10. Primary Model Details\*

| Effect         | valsartan | Estimate | Standard Error | DF | t Value | Pr >  t | Alpha | Lower    | Upper    |
|----------------|-----------|----------|----------------|----|---------|---------|-------|----------|----------|
| Intercept      |           | -0.6761  | 0.5566         | 16 | -1.21   | 0.2421  | 0.05  | -1.8559  | 0.5038   |
| comp2b         |           | -0.01954 | 0.08653        | 24 | -0.23   | 0.8233  | 0.05  | -0.1981  | 0.1591   |
| nyha           |           | -0.1634  | 0.1127         | 24 | -1.45   | 0.1599  | 0.05  | -0.3960  | 0.06912  |
| mlvwtb_z       |           | -0.00103 | 0.01001        | 24 | -0.10   | 0.9192  | 0.05  | -0.02168 | 0.01963  |
| ageb           |           | 0.003106 | 0.004065       | 24 | 0.76    | 0.4523  | 0.05  | -0.00528 | 0.01150  |
| PUBERTY        |           | -0.01133 | 0.08913        | 24 | -0.13   | 0.8999  | 0.05  | -0.1953  | 0.1726   |
| bmib           |           | 0.002641 | 0.006086       | 24 | 0.43    | 0.6682  | 0.05  | -0.00992 | 0.01520  |
| RACE_W         |           | 0.4089   | 0.1860         | 24 | 2.20    | 0.0377  | 0.05  | 0.02514  | 0.7927   |
| HISPANIC       |           | 0.01751  | 0.07988        | 24 | 0.22    | 0.8283  | 0.05  | -0.1473  | 0.1824   |
| gene_thick     |           | 0.2896   | 0.09142        | 24 | 3.17    | 0.0042  | 0.05  | 0.1009   | 0.4783   |
| LVEF           |           | -0.00808 | 0.004792       | 24 | -1.69   | 0.1048  | 0.05  | -0.01797 | 0.001813 |
| systolic_bpb   |           | 0.005744 | 0.002832       | 24 | 2.03    | 0.0538  | 0.05  | -0.00010 | 0.01159  |
| betablocker    |           | -0.08584 | 0.07944        | 24 | -1.08   | 0.2906  | 0.05  | -0.2498  | 0.07812  |
| calciumblocker |           | -0.01349 | 0.1831         | 24 | -0.07   | 0.9419  | 0.05  | -0.3914  | 0.3645   |
| GENDER         |           | 0.08973  | 0.05899        | 24 | 1.52    | 0.1413  | 0.05  | -0.03203 | 0.2115   |
| valsartan      | 0         | -0.2617  | 0.05735        | 24 | -4.56   | 0.0001  | 0.05  | -0.3800  | -0.1433  |
| valsartan      | 1         | 0        | .              | .  | .       | .       | .     | .        | .        |

\*This table shows the details of the mixed model linear regression model from the first imputed dataset.
